# Supplementary material for: Drinks containing anthocyanin-rich blackcurrant extract decrease postprandial blood glucose, insulin and incretin concentrations
Source: PubMed Central journal article supplement (PMC5170886; doi:10.1016/j.jnutbio.2016.09.002), 2016-12
Supplement: mmc1.pdf [file mmc1.pdf]

**A**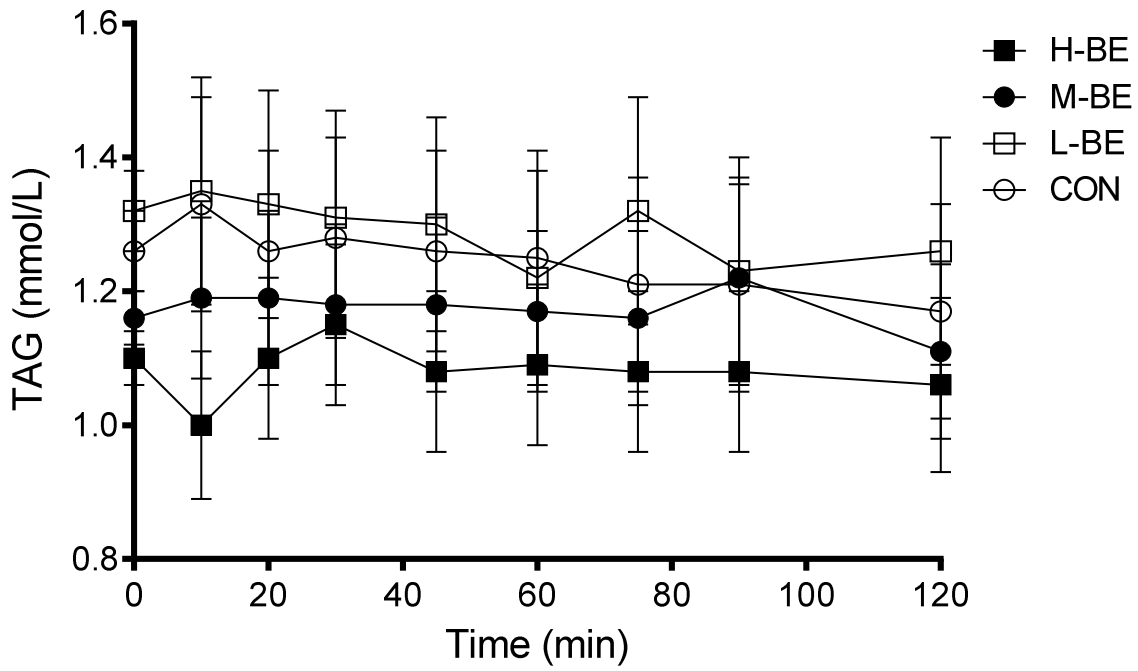**B**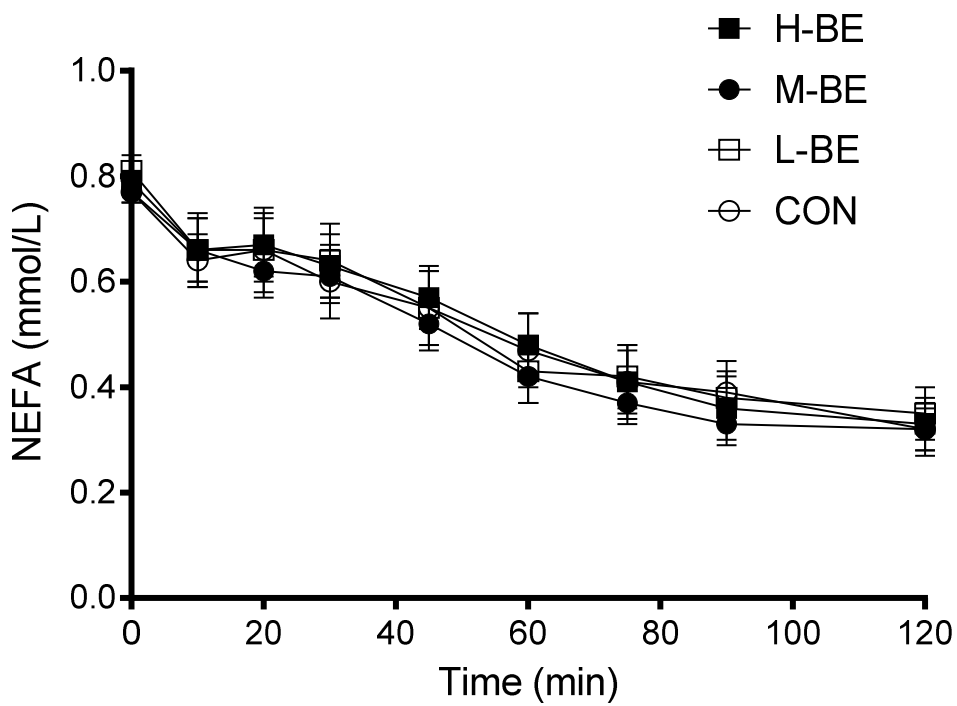

Supplementary Figure 1: Postprandial plasma TAG and NEFA concentrations

Mean ( $\pm$ SEM) plasma TAG (**A**) and NEFA (**B**) concentrations following ingestion of 4 low sugar fruit drinks 2 minutes before consuming a mixed carbohydrate meal, in randomized order: H-BE: high blackcurrant extract (600 mg anthocyanins); M-BE: medium blackcurrant extract (300 mg anthocyanins); L-BE: low blackcurrant extract (150 mg anthocyanins); CON: placebo (0 mg anthocyanins).  $n = 22$ . All data were natural log transformed before mixed model analysis. For TAG, there was a treatment effect ( $P < 0.0000001$ ) on raw values but not for changes from baseline and no treatment  $\times$  time interactions was observed. There were no statistically significant treatment differences in NEFA concentrations. **A**: <sup>a</sup> $P < 0.005$  for the treatment difference at baseline.
